# Supplementary material
Source: publisher site journal article supplement (https://www.dovepress.com/get_supplementary_file.php?f=441869.docx)
Supplement: Supplementary file 1 [file get_supplementary_file.php]

### Table S1: PRISMA-A checklist for acupuncture1

| **Subjects** | **PRISMA for Acupuncture** | | **Page** |
| --- | --- | --- | --- |
| ***Title*** |  |  |  |
| **Title** | 1* Identify the report as a systematic review, a meta-analysis, or both; if applicable, state the specific type of acupuncture treatment, such as manual acupuncture or electroacupuncture. | | 3 |
| ***Abstract*** |  |  |  |
| **Structured summary** | 2† Provide a structured summary including, as applicable: background; objectives; data sources; study eligibility criteria, participants, and interventions; study appraisal and synthesis methods; results limitations; conclusions and implications of key findings; systematic review registration number. | | 1 |
| ***Introduction*** |  |  |  |
| **Rationale** | 3* Describe the rationale for what is already known about acupuncture for the target condition in the background; if applicable, state what is already known about the specific types of acupuncture to be studied, and describe whether there is any difference of the effects among different types of acupuncture. | | 3 |
| **Objectives** | 4† Provide an explicit statement of questions being addressed with reference to participants, interventions, comparisons, outcomes, and study design (PICOS) | | 3 |
| ***Methods*** |  |  |  |
| **Protocol and registration** | 5† Indicate if a review protocol exists, if and where it can be accessed (e.g., web address), and, if available, provide registration information including registration number. | | 3 |
| **Eligibility criteria** | 6† Specify study characteristics (e.g., PICOS, length of follow-up) and report characteristics (e.g., years considered, language, publication status) used as criteria for eligibility, giving rationale.  6a.1‡ Describe the diagnostic criteria of the target condition in Western medicine.  6a.2‡ If applicable, describe the diagnostic criteria in terms of Traditional Medicine, such as Traditional Chinese Medicine.  6b‡ Describe the types of acupuncture to be included, such as traditional acupuncture, electroacupuncture, or fire acupuncture.  6c‡ If applicable, report measures for therapeutic effects using the terminology of either traditional medicine (e.g. syndrome score for syndrome remission) or Western medicine (e.g. pain intensity). | | 4 |
| **Information sources** | 7* Describe all sources of information (e.g., databases with dates of coverage, contact with study authors to identify additional studies) in the search, and report the date of the last search. If applicable, report the databases or complementary search methods for acupuncture or traditional medicine. | | 4 and Table S2 in supplementary file |
| **Search** | 8* Present full electronic search strategy for at least one commonly used database (e.g. MEDLINE), including any limits used, such that it could be repeated. If applicable, include the full search strategy for at least a Western and a traditional medicine database for each systematic review where both were used. | | Table S2 in supplementary file |
| **Study selection** | 9† State the process for selecting studies (i.e., screening, eligibility, included in systematic review, and, if applicable, included in the meta-analysis). | | 4, 5 |
| **Data collection**  **process** | 10† Describe method of data extraction from reports (e.g., piloted forms, independently, in duplicate) and any processes for obtaining and confirming data from investigators. | | 4 |
| **Data items** | 11* List and define all variables for which data were sought (e.g., PICOS, funding sources) and any assumptions and simplifications made; describe data items about details of acupuncture interventions and controls (**e.g.,** sham acupuncture) referring to TIDieR when applicable. | | 4 |
| **Risk of bias in**  **individual studies** | 12† Describe methods used for assessing risk of bias of individual studies (including specification of whether this was done at the study or outcome level), and how this information is to be used in any data synthesis. | | 5 |
| **Summary measures** | 13† State the principal summary measures (e.g., risk ratio, difference in means). | | 4 |
| **Synthesis of results** | 14† Describe the methods of handling data and combining results of studies, if done, including measures of consistency (e.g., I2) for each meta-analysis. | | 5 |
| **Risk of bias across**  **studies** | 15† Specify any assessment of risk of bias that may affect the cumulative evidence (e.g., publication bias, selective reporting within studies). | | 5 |
| **Additional analyses** | 16† Describe methods of additional analyses (e.g., sensitivity or subgroup analyses, meta-regression), if done, indicating which were pre-specified. | | 5 |
| ***Results*** |  |  |  |
| **Study selection** | 17† Give numbers of studies screened, assessed for eligibility, and included in the review, with reasons for exclusions at each stage, ideally with a flow diagram. | | 6, Figure1 |
| **Study characteristics** | 18* For each study, present characteristics that were extracted (e.g., study size, PICOS, follow-up period) and provide the citations of the included studies. Summarize details of the acupuncture intervention for each study in a table referring to TIDieR**.**  18a‡ Describe details of “De-qi” after acupuncture reported in the included studies. | | Tables 1-4 |
| **Risk of bias within**  **studies** | 19† Present data on risk of bias of each study and, if available, any outcome-level assessment (see item 12). | | 6 |
| **Results of individual**  **studies** | 20† For all outcomes considered (benefits or harms), present, for each study: (a) simple summary data for each intervention group and (b) effect estimates and confidence intervals, ideally with a forest plot. | | 7 |
| **Synthesis of results** | 21† Present results of each meta-analysis done, including confidence intervals and measures of consistency. | | 7 |
| **Risk of bias across**  **studies** | 22† Present results of any assessment of risk of bias across studies (see item 15). | | 7 |
| **Additional analysis** | 23† Give results of additional analyses, if done (e.g., sensitivity or subgroup analyses, meta-regression [see item 16]). | | 7 |
| ***Discussion*** |  |  |  |
| **Summary of evidence** | 24† Summarize the main findings including the strength of evidence for each main outcome; consider their relevance to key groups (e.g., health care providers, users, and policy  makers). | | 9 |
| **Limitations** | 25† Discuss limitations at study and outcome level (e.g., risk of bias), and at review level (e.g., incomplete retrieval of identified research, reporting bias). | | 9 |
| **Conclusions** | 26† Provide a general interpretation of the results in the context of other evidence, and implications for future research. | | 10 |
| ***Funding*** |  |  |  |
| **Funding** | 27† Describe sources of funding for the systematic review and other support (e.g., supply of data); role of funders for the systematic review. | | 12-13 |

Note: * modified original item  † unmodified item from PRISMA ‡ new extended item

For more information: https://prisma-statement.org/

### Table S2: Search strategy

| **PubMed/Medline: 661**  ("athletes"[MeSH Terms] OR “Para-Athletes" [MeSH Terms] OR "sports"[MeSH Terms] OR “Athletic Injuries”[MeSH] OR "athletes"[Title/Abstract] OR "athlete"[Title/Abstract] OR "athletically"[Title/Abstract] OR "athlets"[Title/Abstract] OR "sport"[Title/Abstract] OR "sport medicine” [Title/Abstract] OR "sport injuries” [Title/Abstract] OR "sports"[Title/Abstract] OR "sports medicine” [Title/Abstract] OR "sports injury” [Title/Abstract] OR "sports injuries” [Title/Abstract] OR "athletic"[Title/Abstract] OR "athletics"[Title/Abstract] OR "football” [Title/Abstract] OR "soccer” [Title/Abstract] OR "basketball” [Title/Abstract] OR "bicycling” [Title/Abstract] OR "boxing” [Title/Abstract] OR "golf” [Title/Abstract] OR "gymnastic*” [Title/Abstract] OR "Runner*” [Title/Abstract] OR "jogg*” [Title/Abstract] OR "marathon*” [Title/Abstract] OR "volleyball” [Title/Abstract] OR "weight lifting” [Title/Abstract] OR "swimm*” [Title/Abstract])  AND  (“acupuncture” [MeSH] OR “acupuncture therapy” [Mesh:NoExp] OR “Acupuncture, Ear” [MeSH] OR “acupuncture points” [MeSH] OR “Acupuncture Analgesia” [MeSH] OR “electroacupuncture” [MeSH] OR “acupuncture” [Title/Abstract] OR “Pharmacopuncture” [Title/Abstract] OR “electroacupuncture” [Title/Abstract] OR “electro-acupuncture” [Title/Abstract] OR “dry needling” [Title/Abstract] OR “trigger point” [Title/Abstract] OR “acupoint*” [Title/Abstract] OR Acupressure [Title/Abstract]) | **03 December 2023** |
| --- | --- |
| **OVID/AMED: 1291**  **(**Rehabilitation/ or Athletic injuries/ or Exercise/ or Injuries/ or Athletes/ or athletes.mp. or para-athletes.mp. or Sports/ or sport.mp. or Football/ or sport medicine.mp. or sport injuries.mp. or sports injury.mp. or sports injuries.mp. or athletic.mp. or athletics.mp. or Soccer/ or soccer.mp. or basketball.mp. or Bicycling/ or bicycling.mp. or boxing.mp. or Boxing/ or Golf/ or golf.mp. or Gymnastics/ or gymnastic.mp. or Running/ or runner.mp. or Jogging/ or jogging.mp. or Walking/ or Diseases in athletes/ or marathon.mp. or volleyball.mp. or Lifting/ or weight lifting.mp. or Swimming/ or swimming.mp.) AND (acupuncture.mp. or Acupuncture/ or Acupuncture therapy/ or Acupoints/ or acupuncture therapy.mp. or electroacupuncture.mp. or Electroacupuncture/ or Pharmacopuncture.mp. or electro-acupuncture.mp. or Needling/ or dry needling.mp. or trigger point.mp. or acupoint.mp or acupoints.mp. or Acupoints/ or Acupressure/ or Ear acupuncture/ or Neck pain/ or hand acupuncture.mp.) | **03 December 2023** |
| **Web of Science: 2039**  (TS=((athletes) OR (athlete) OR (athletically) OR (sport) OR (sport medicine) OR (sport injuries) OR (sports) OR (sports medicine) OR (sports injury) OR (sports injuries) OR (athletic) OR (athletics) OR (football) OR (soccer) OR (basketball) OR (bicycling) OR (boxing) OR (golf) OR (gymnastic) OR (Running) OR (jogging) OR (marathon) OR (volleyball) OR (weight lifting) OR (swimming)))  AND  (TS=((acupuncture) OR (Pharmacopuncture) OR (electroacupuncture) OR (electro-acupuncture) OR (dry needling) OR (trigger point) OR (acupoint) OR (Acupressure))) | **03 December 2023** |
| **EBSCO/SportDISCUS: 874**  ((acupuncture) OR (Pharmacopuncture) OR (electroacupuncture) OR (electro-acupuncture) OR (dry needling) OR (trigger point) OR (acupoint) OR (Acupressure)) OR (DE "ACUPUNCTURE" OR DE "ELECTROACUPUNCTURE" OR DE "acupressure" OR DE "ACUTAPING")  AND  (athletes) OR (athlete) OR (athletically) OR (sport) OR (sport medicine) OR (sport injuries) OR (sports) OR (sports medicine) OR (sports injury) OR (sports injuries) OR (athletic) OR (athletics) OR (football) OR (soccer) OR (basketball) OR (bicycling) OR (boxing) OR (golf) OR (gymnastic) OR (Running) OR (jogging) OR (marathon) OR (volleyball) OR (weight lifting) OR (swimming)  AND  (((((DE "DISEASES in athletes" OR DE "ATHLETES" OR DE "ABORIGINAL Australian athletes" OR DE "AFRICAN athletes" OR DE "AMATEUR athletes" OR DE "ARAB athletes" OR DE "ARCHERS" OR DE "ASIAN athletes" OR DE "ATHLETES as actors" OR DE "ATHLETES in art" OR DE "ATHLETES with disabilities" OR DE "BADMINTON players" OR DE "BASEBALL players" OR DE "BASKETBALL players" OR DE "BLACK athletes" OR DE "BOBSLEDDERS" OR DE "BODYBUILDERS" OR DE "BOWLERS" OR DE "BOXERS (Sports)" OR DE "BULLFIGHTERS" OR DE "CANADIAN athletes" OR DE "CANOEISTS" OR DE "CELEBRITY athletes" OR DE "CHILD athletes" OR DE "CHILDREN of athletes" OR DE "CHRISTIAN athletes" OR DE "COLLEGE athletes" OR DE "CRICKET players" OR DE "CROQUET players" OR DE "CURLERS (Athletes)" OR DE "CYCLISTS" OR DE "DEFENSIVE players" OR DE "DIABETIC athletes" OR DE "ELITE athletes" OR DE "ENDURANCE athletes" OR DE "EUROPEAN athletes" OR DE "FENCERS" OR DE "FOOTBALL players" OR DE "GAY athletes" OR DE "GLADIATORS" OR DE "GOLFERS" OR DE "GYMNASTS" OR DE "HANDBALL players" OR DE "HIGH school athletes" OR DE "HOCKEY players" OR DE "INTERSEX athletes" OR DE "JAI alai players" OR DE "JEWISH athletes" OR DE "JUNIOR high school athletes" OR DE "KABADDI players" OR DE "LACROSSE players" OR DE "LAWN bowlers" OR DE "LGBTQ+ athletes" OR DE "LONG-term athlete development" OR DE "MALE athletes" OR DE "MARTIAL artists" OR DE "MEXICAN athletes" OR DE "MIDDLE school athletes" OR DE "MOUNTAINEERS" OR DE "MUSLIM athletes" OR DE "NATIVE American athletes" OR DE "NETBALL players" OR DE "OFFENSIVE players" OR DE "OLDER athletes" OR DE "OLYMPIC athletes" OR DE "ORIENTEERS" OR DE "PACIFIC Islander athletes" OR DE "PROFESSIONAL athletes" OR DE "ROWERS" OR DE "RUGBY football players" OR DE "RUNNERS (Sports)" OR DE "SKATERS" OR DE "SKIERS" OR DE "SKYDIVERS" OR DE "SNOWBOARDERS" OR DE "SOCCER players" OR DE "SOFTBALL players" OR DE "SQUASH players" OR DE "STARTING players" OR DE "SUBSTITUTE players" OR DE "SURFERS" OR DE "SWIMMERS" OR DE "TABLE tennis players" OR DE "TEAM handball players" OR DE "TENNIS players" OR DE "TRACK & field athletes" OR DE "TRIATHLETES" OR DE "VOLLEYBALL players" OR DE "WATER polo players" OR DE "WEIGHT lifters" OR DE "WINDSURFERS (Persons)" OR DE "WOMEN athletes" OR DE "WRESTLERS") AND (DE "ATHLETES with disabilities" OR DE "AUTISTIC athletes" OR DE "BASEBALL players with disabilities" OR DE "BASKETBALL players with disabilities" OR DE "BLIND athletes" OR DE "DEAF athletes" OR DE "SKIERS with disabilities" OR DE "WOMEN athletes with disabilities" OR DE "ATHLETES' health" OR DE "WOMEN athletes' health")) OR (DE "ATHLETIC ability" OR DE "ATHLETIC ability testing")) OR (DE "ATHLETICS" OR DE "AMATEUR sports" OR DE "ATHLETIC tryouts" OR DE "BAG punching" OR DE "BOXING" OR DE "COLLEGE sports" OR DE "DUATHLON" OR DE "FENCING" OR DE "GOODWILL Games" OR DE "GYMNASTICS" OR DE "HIGHLAND games" OR DE "JIU-jitsu" OR DE "MIXED martial arts" OR DE "PANCRATIUM" OR DE "PARKOUR" OR DE "POWERLIFTING" OR DE "PROFESSIONALISM in sports" OR DE "SENIOR Olympics" OR DE "SKATING" OR DE "SWIMMING" OR DE "TETRATHLON" OR DE "TRACK & field" OR DE "TRIATHLON" OR DE "WALKING" OR DE "WEIGHT lifting" OR DE "WRESTLING")) OR (DE "SPORTS" OR DE "AERODYNAMICS in sports" OR DE "AERONAUTICAL sports" OR DE "AGE & sports" OR DE "AMATEUR sports" OR DE "ANIMAL sports" OR DE "ANTISEMITISM in sports" OR DE "AQUATIC sports" OR DE "BALL games" OR DE "BALLISTICS in sports" OR DE "BASEBALL" OR DE "BIOMECHANICS in sports" OR DE "COLLEGE sports" OR DE "COMBAT sports" OR DE "COMMUNICATION in sports" OR DE "CONTACT sports" OR DE "CROSS-training (Sports)" OR DE "DISC golf" OR DE "DISCRIMINATION in sports" OR DE "DOG sports" OR DE "DOPING in sports" OR DE "ENDURANCE sports" OR DE "EXTREME sports" OR DE "FANTASY sports" OR DE "FASCISM & sports" OR DE "FEMINISM & sports" OR DE "GAELIC games" OR DE "GAY Games" OR DE "GOODWILL Games" OR DE "GYMNASTICS" OR DE "HOCKEY" OR DE "HOMOPHOBIA in sports" OR DE "HYDRODYNAMICS in sports" OR DE "INDIVIDUAL sports" OR DE "KINEMATICS in sports" OR DE "KNIFE throwing" OR DE "LGBTQ+ people & sports" OR DE "LOG-chopping (Sports)" OR DE "MASCULINITY in sports" OR DE "MASS media & sports" OR DE "MILITARY sports" OR DE "MINORITIES in sports" OR DE "MOTION pictures in sports" OR DE "MOTORSPORTS" OR DE "NATIONAL socialism & sports" OR DE "NATIONALISM & sports" OR DE "NONVERBAL communication in sports" OR DE "OLYMPIC Games" OR DE "PARKOUR" OR DE "PHYSICS in sports" OR DE "PRESIDENTS -- Sports" OR DE "PROFESSIONAL sports" OR DE "PROFESSIONALISM in sports" OR DE "RACISM in sports" OR DE "RACKET games" OR DE "RADAR in sports" OR DE "RECREATIONAL sports" OR DE "REGIONALISM & sports" OR DE "ROBOTICS in sports" OR DE "RODEOS" OR DE "ROLLER skating" OR DE "SCHOOL sports" OR DE "SENIOR Olympics" OR DE "SEXUAL harassment in sports" OR DE "SHOOTING (Sports)" OR DE "SHUTOUTS (Sports)" OR DE "SOCIALISM & sports" OR DE "SOFTBALL" OR DE "SPORT for all" OR DE "SPORTS & state" OR DE "SPORTS & technology" OR DE "SPORTS & theater" OR DE "SPORTS & tourism" OR DE "SPORTS for children" OR DE "SPORTS for girls" OR DE "SPORTS for older people" OR DE "SPORTS for people with disabilities" OR DE "SPORTS for youth" OR DE "SPORTS forecasting" OR DE "SPORTS in antiquity" OR DE "SPORTS penalties" OR DE "SPORTS photography" OR DE "SPORTS rivalries" OR DE "SPORTS teams" OR DE "SPORTS tourism" OR DE "STEREOTYPES in sports" OR DE "TARGETS (Sports)" OR DE "TEAM sports" OR DE "TEAMWORK (Sports)" OR DE "TELEVISION & sports" OR DE "TRACEURS" OR DE "VIDEO tapes in sports" OR DE "VIOLENCE in sports" OR DE "WINTER sports" OR DE "WOMEN'S sports")) OR (DE "SPORTS injuries" OR DE "ACHILLES tendinitis" OR DE "AEROBICS injuries" OR DE "AQUATIC sports injuries" OR DE "BASEBALL injuries" OR DE "BASKETBALL injuries" OR DE "BOXING injuries" OR DE "COMMOTIO cordis" OR DE "CRICKET injuries" OR DE "DELAYED onset muscle soreness" OR DE "EQUESTRIAN accidents" OR DE "FOOTBALL injuries" OR DE "GOLF injuries" OR DE "GYMNASTICS injuries" OR DE "HIKING injuries" OR DE "HOCKEY injuries" OR DE "HORSE sports injuries" OR DE "IN-line skating injuries" OR DE "JOGGING injuries" OR DE "JUDO injuries" OR DE "JUMPER'S knee" OR DE "KARATE injuries" OR DE "MARTIAL arts injuries" OR DE "MOTORSPORTS injuries" OR DE "NETBALL injuries" OR DE "RACKET game injuries" OR DE "RUGBY football injuries" OR DE "RUNNING injuries" OR DE "SKATEBOARDING injuries" OR DE "SOCCER injuries" OR DE "TENNIS injuries" OR DE "TURF toe" OR DE "VAULTING injuries" OR DE "VOLLEYBALL injuries" OR DE "WALKING (Sports) injuries" OR DE "WEIGHT training injuries" OR DE "WINTER sports injuries") | **28 April 2021** |
| **Google Scholar**  Pain acupuncture  Search results:100  Pain acupuncture football  Search results:100  Pain acupuncture soccer  Search results:100  Pain acupuncture basketball  Search results:100  Pain acupuncture bicycling  Search results:100  Pain acupuncture boxing  Search results:100  Pain acupuncture runner  Search results:100  Pain acupuncture golf  Search results:100  Pain acupuncture gymnastic  Search results:100  Pain acupuncture marathon  Search results:100  Pain acupuncture swimming  Search results:100  Pain acupuncture volleyball  Search results:100  Pain acupuncture weight lifting  Search results:100  Dry needling athlete  Search results:100 | **14 February 2022** |

### Table S3: Quality assessment tool for Observational Cohort and Cross-sectional studies2

| **Signaling questions of the Quality Assessment Tool for Observational Cohort and Cross-Sectional Studies** | |
| --- | --- |
| 1 | Was the research question or objective in this paper clearly stated? |
| 2 | Was the study population clearly specified and defined? |
| 3 | Was the participation rate of eligible persons at least 50%? |
| 4 | Were all the subjects selected or recruited from the same or similar populations (including the same time period)? Were inclusion and exclusion criteria for being in the study prespecified and applied uniformly to all participants? |
| 5 | Was a sample size justification, power description, or variance and effect estimates provided? |
| 6 | For the analyses in this paper, were the exposure(s) of interest measured prior to the outcome(s) being measured? |
| 7 | Was the timeframe sufficient so that one could reasonably expect to see an association between exposure and outcome if it existed? |
| 8 | For exposures that can vary in amount or level, did the study examine different levels of the exposure as related to the outcome (e.g., categories of exposure, or exposure measured as continuous variable)? |
| 9 | Were the exposure measures (independent variables) clearly defined, valid, reliable, and implemented consistently across all study participants? |
| 10 | Was the exposure(s) assessed more than once over time? |
| 11 | Were the outcome measures (dependent variables) clearly defined, valid, reliable, and implemented consistently across all study participants? |
| 12 | Were the outcome assessors blinded to the exposure status of participants? |
| 13 | Was loss to follow-up after baseline 20% or less? |
| 14 | Were key potential confounding variables measured and adjusted statistically for their impact on the relationship between exposure(s) and outcome(s)? |

### Table S4: Quality assessment of included observational studies

| **Signaling**  **Question** | **Luetmer, 20193** | **Garlanger, 20174** | **Gouttebarge, 20185** | **Harding, 20096** | **Qasrawi, 20217** | **McCray, 20198** | **Kent,**  **20209** | **Stacey, 199910** |
| --- | --- | --- | --- | --- | --- | --- | --- | --- |
| 1 |  |  |  |  |  |  |  |  |
| 2 |  |  |  |  |  |  |  |  |
| 3 |  |  |  |  |  |  |  |  |
| 4 |  |  |  |  |  |  |  |  |
| 5 |  |  |  |  |  |  |  |  |
| 6 |  |  |  |  |  |  |  |  |
| 7 |  |  |  |  |  |  |  |  |
| 8 |  |  |  |  |  |  |  |  |
| 9 |  |  |  |  |  |  |  |  |
| 10 |  |  |  |  |  |  |  |  |
| 11 |  |  |  |  |  |  |  |  |
| 12 |  |  |  |  |  |  |  |  |
| 13 |  |  |  |  |  |  |  |  |
| 14 |  |  |  |  |  |  |  |  |
| COI |  |  |  |  |  |  |  |  |
|  |  | Not Applicable |  | Low risk of bias |  | High risk of bias |  | Cannot Determine |
|  |  | Not Reported |  |  |  |  |  |  |

### Table S5: Quality assessment of included clinical trials

| **Risk of Bias assessment** | **Selection Bias** | | **Performance Bias** | **Detection Bias** | **Attrition Bias** | **Reporting Bias** |
| --- | --- | --- | --- | --- | --- | --- |
| **Sequence generation** | **Allocation concealment** | **Blinding of participants and personnel** | **Blinding of outcome assessment** | **Incomplete outcome data** | **Selective outcome reporting** |
| **Study** |  |  |  |  |  |  |
| **Cushman, 202111** | + | - | - | - | + | + |
| **Luo, 201712** | - | - | - | - | + | + |
| **Callison, 200213** | - | - | - | - | + | + |
|  | Low risk of bias | + | High risk of bias | - |  |  |

### Reference list

1. Wang X, Chen Y, Liu Y, et al. Reporting items for systematic reviews and meta-analyses of acupuncture: the PRISMA for acupuncture checklist. *BMC Complement Altern Med.* 2019;19(1):208.

2. National Heart Lung and Blood Institute. Study Quality Assessment Tools. NHLBI, NIH. Published 2022 Accessed2022.

3. Luetmer MT, Do A, Canzanello NC, Bauer BA, Laskowski ER. The Feasibility and Effects of Acupuncture on Muscle Soreness and Sense of Well-being in an Adolescent Football Population. *American Journal of Physical Medicine & Rehabilitation.* 2019;98(11):1-7.

4. Garlanger KL, Fredericks WH, Do A, Bauer BA, Laskowski ER. The Feasibility and Effects of Acupuncture in an Adolescent Nordic Ski Population. *Pm r.* 2017;9(8):795-803.

5. Gouttebarge V, Veenstra E, Goedegebuure S, Frings-Dresen M, Kuijer PP. Professional football players at risk for non-acute groin injuries during the first half of the season: A prospective cohort study in The Netherlands. *Journal of Back & Musculoskeletal Rehabilitation.* 2018;31(1):15-21.

6. Harding S, Swait G, Johnson IP, Cunliffe C. Utilisation of CAM by runners in the UK: A retrospective survey among non-elite marathon runners. *Clinical Chiropractic.* 2009;12(2):61-66.

7. Qasrawi H, Assi S, Ghanim N, Zyoud SH, Al-Jabi SW. A Descriptive Study of Pain Relief Practices Among Student-Athletes in Palestine: Focus on Non-Steroidal Anti-Inflammatory Drugs, and Complementary Medicine and Alternative Medicine Use. *Journal of Community Health.* 2021;46(4):684-692.

8. McCray S. Understanding the Perceptions of Dry Needling in NCAA Division I Athletes. 2019.

9. Kent JB, Tanabe KO, Muthusubramanian A, Statuta SM, MacKnight JM. Complementary and Alternative Medicine Prescribing Practices Among Sports Medicine Providers. *Alternative Therapies in Health and Medicine.* 2020;26(5):28-32.

10. Stacey R. Acupuncture and alternative therapies in premiership football clubs. *Acupuncture in Medicine.* 1999;17(1):62-63.

11. Cushman DM, Cummings K, Skinner L, et al. Postrace Dry Needling Does Not Reduce Subsequent Soreness and Cramping-A Randomized Controlled Trial. *Clin J Sport Med.* 2021;31(3):225-231.

12. Luo P, Lin H. Curative efficacy of myofascial pain syndrome (MPS) treated by comprehensive treatment focusing on acupuncture stretching. *International Journal of Clinical Acupuncture.* 2017;26(2):85-90.

13. Callison M. Clinical study. Acupuncture and tibial stress syndrome (shin splints). *Journal of Chinese Medicine.* 2002;70:24-27.
